# Supplementary material for: Long noncoding RNA Malat1 regulates differential activation of macrophages and response to lung injury
Source: JCI journal article supplement (doi:10.1172/jci.insight.124522), 2019-01-24

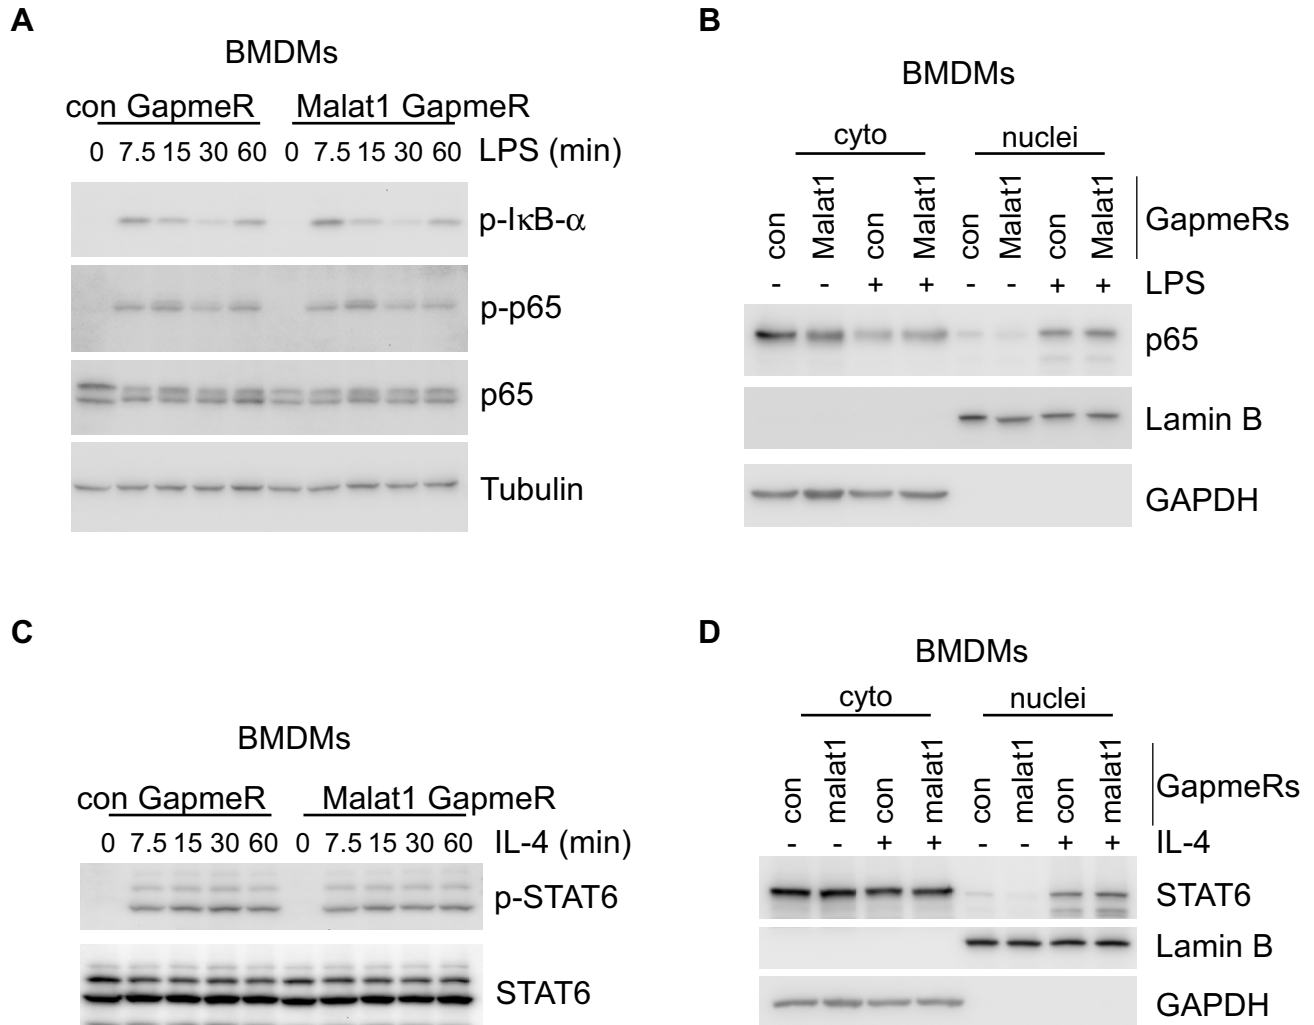

**Supplementary Figure 1. Malat1 knockdown has no effects on proximal signaling events upon LPS or IL-4 stimulation in macrophages.** (A) BMDMs were transfected with 20 nM con GapmeR or Malat1 GapmeR. 48h after transfection, the cells were treated with 100 ng/ml LPS for the indicated time. Levels of the indicated proteins were determined by Western blotting. (B) BMDMs were transfected with 20 nM con GapmeR or Malat1 GapmeR. 48h after transfection, the cells were treated with or without 100 ng/ml LPS for 1h. Cytoplasmic and nuclear fractions were prepared and levels of the indicated proteins were determined by Western blotting. (C) BMDMs were transfected with 20 nM con GapmeR or Malat1 GapmeR. 48h after transfection, the cells were treated with 5 ng/ml IL-4 for the indicated time. Levels of the indicated proteins were determined by Western blotting. (D) BMDMs were transfected with 20 nM con GapmeR or Malat1 GapmeR. 48h after transfection, the cells were treated with or without 5 ng/ml IL-4 for 1h. Cytoplasmic and nuclear fractions were prepared and levels of the indicated proteins were determined by Western blotting.

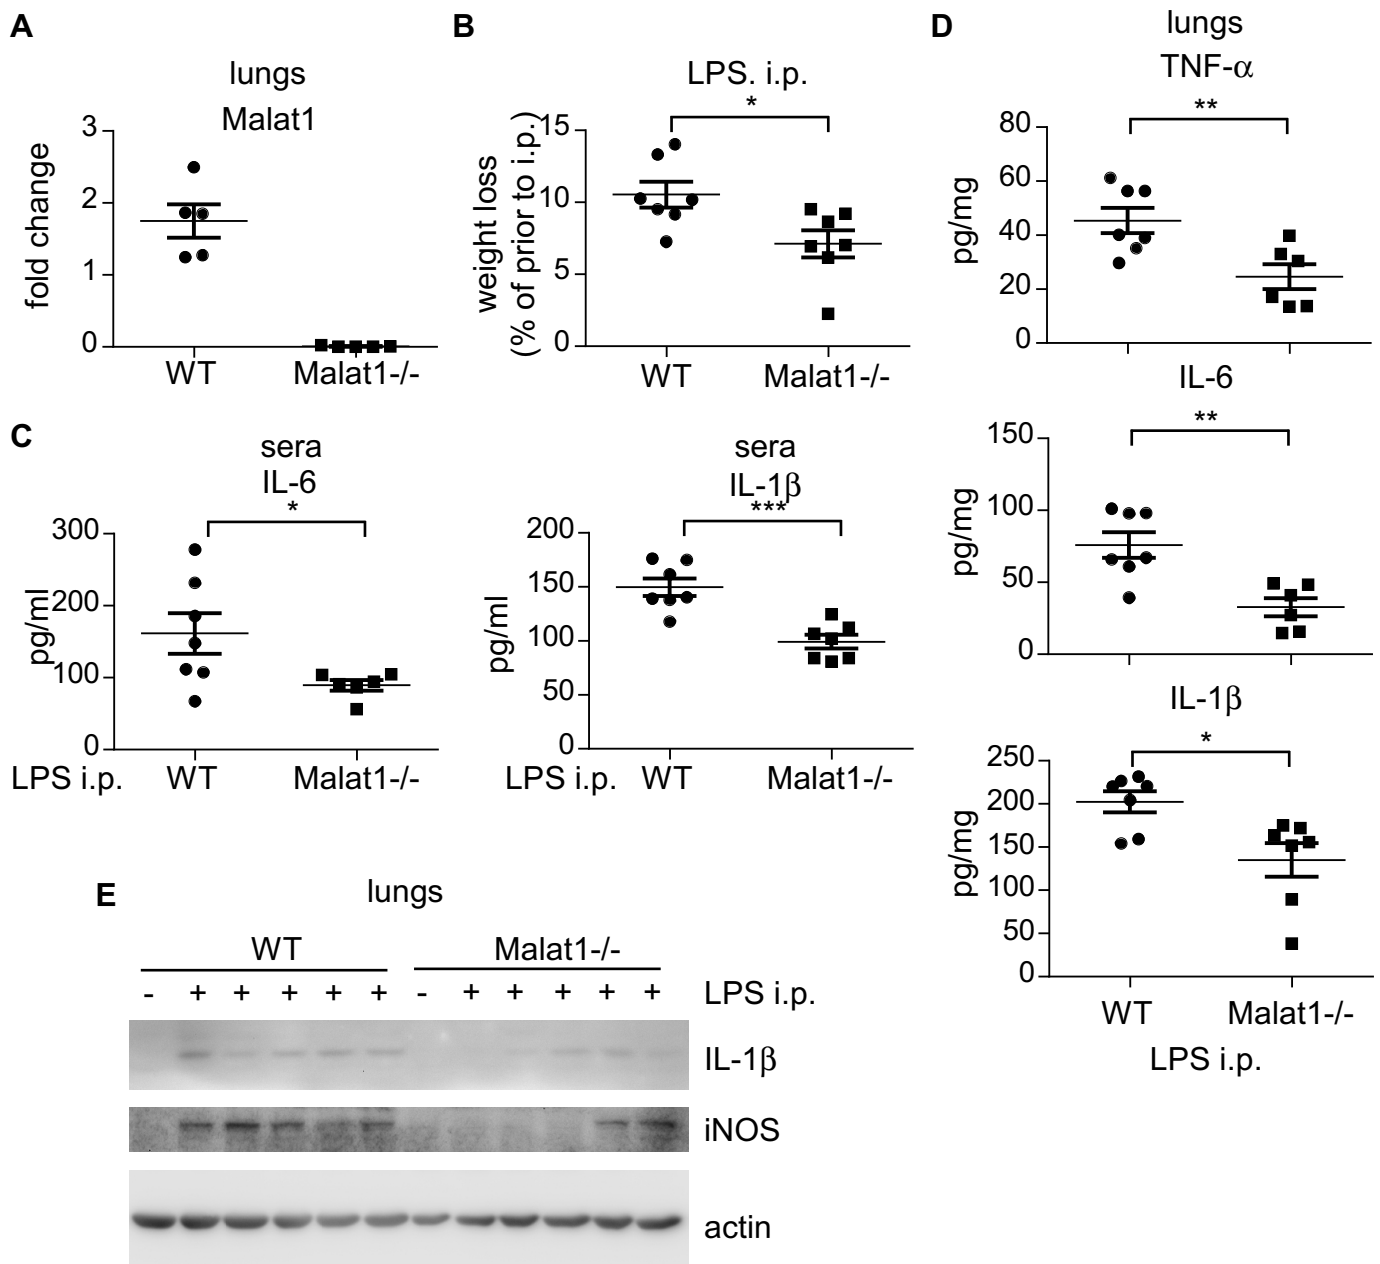

**Supplementary Figure 2. Global knockout of Malat1 (Malat1<sup>-/-</sup>) attenuates endotoxemia induced systemic and pulmonary inflammation.** (A) Levels of Malat1 in the lungs of wild-type (WT) and Malat1<sup>-/-</sup> mice were determined by real-time PCR.  $n=5$  each for WT and Malat1<sup>-/-</sup> mice; mean $\pm$ SE. (B) Wild-type and Malat1<sup>-/-</sup> mice were i.p. injected with 10 mg/kg LPS in 500  $\mu$ l saline. 18h after LPS injection, percentage of mouse weight loss was calculated. \*  $p < 0.05$ . (C) Wild-type and Malat1<sup>-/-</sup> mice were i.p. injected with 10 mg/kg LPS in 500  $\mu$ l saline. 18h after LPS injection, mice were sacrificed and sera prepared. Levels of the indicated pro-inflammatory cytokines were determined by ELISA. \*  $p < 0.05$ , \*\*\*  $p < 0.001$ . (D) Wild-type and Malat1<sup>-/-</sup> mice were i.p. injected with 10 mg/kg LPS in 500  $\mu$ l saline. 18h after LPS injection, mice were sacrificed. Lung homogenates were prepared. Levels of the indicated pro-inflammatory cytokines were determined by ELISA. \*  $p < 0.05$ , \*\*  $p < 0.01$ . (E) Experiments were performed as in "D". Levels of IL-1 $\beta$  and iNOS were determined by Western blotting.  $n=7$  each for WT and Malat1<sup>-/-</sup> mice; mean $\pm$ SE.

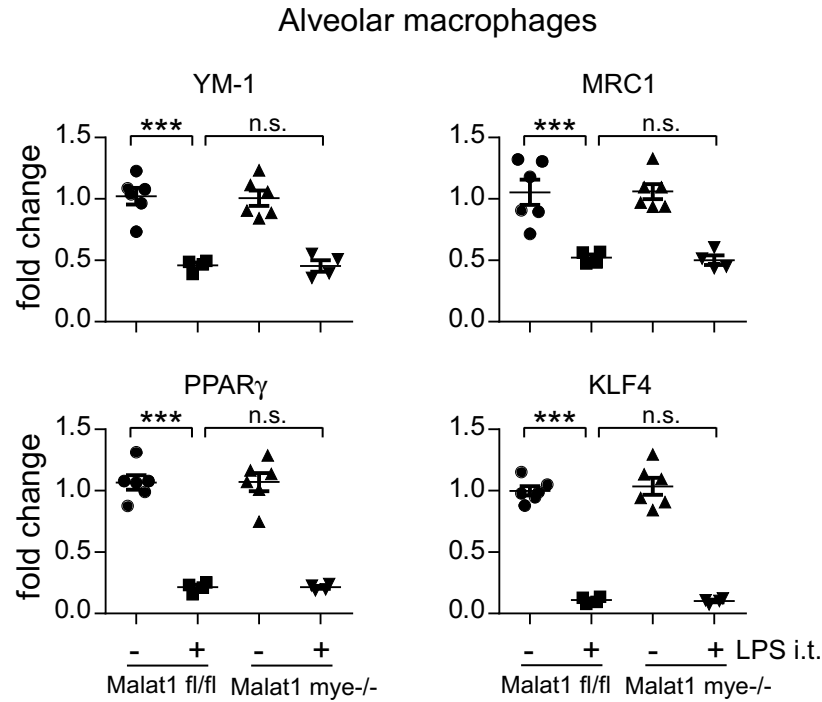

**Supplementary Figure 3. Myeloid ablation of Malat1 had no effect on expression of markers and mediators of alternative activation in the alveolar macrophages of the LPS treated mice.** Malat1 fl/fl and Malat1 mye-/- mice were i.t. instilled with 50  $\mu$ l saline or 5 mg/kg LPS in 50  $\mu$ l saline. 24h after administration, alveolar macrophages were harvested and mRNA levels of the indicated anti-inflammatory genes determined by real-time PCR. n=6, 4, 6, 4 mice for each group; mean $\pm$ SE; \*\*\*  $p$ <0.001, one-way ANOVA with Bonferroni test.

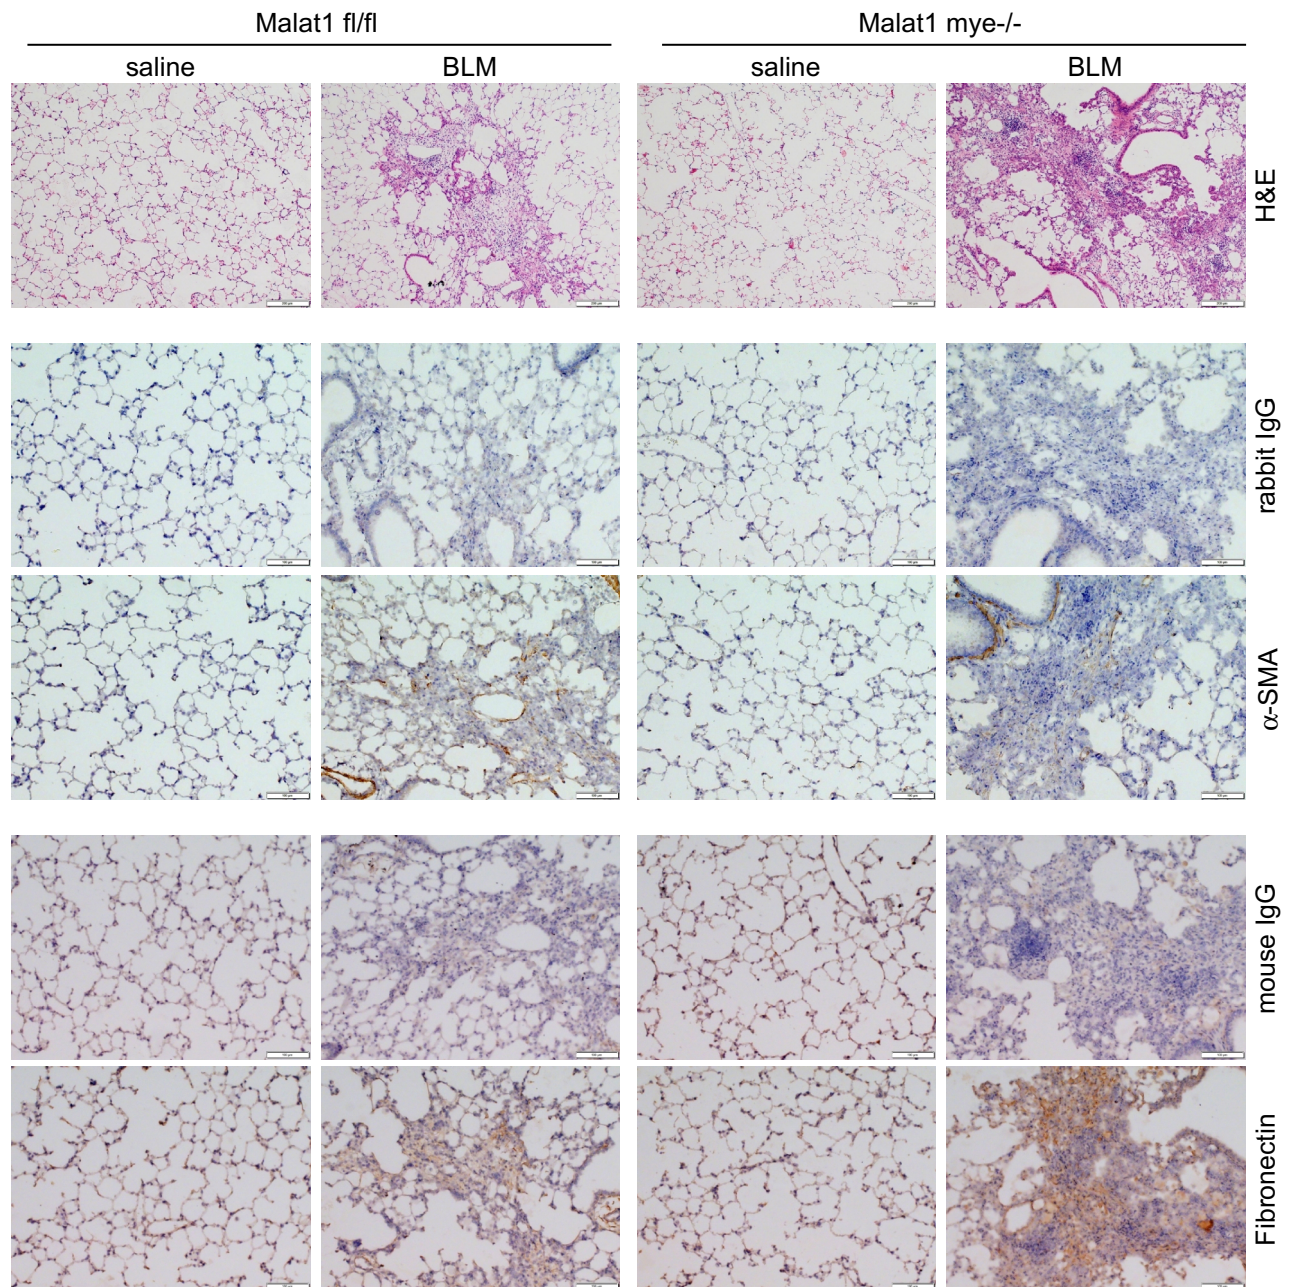

**Supplementary Figure 4. Myeloid ablation of Malat1 aggravates bleomycin induced pulmonary fibrosis.** Malat1 fl/fl and Malat1 mye<sup>-/-</sup> mice were i.t. instilled with 50  $\mu$ l saline or 1.5 U/kg bleomycin (BLM) in 50  $\mu$ l saline. 3 weeks after bleomycin administration, mice were sacrificed and lung histological sections prepared. Haemotoxylin and eosin (H&E) staining and IHC stainings of  $\alpha$ -SMA and fibronectin were performed. H&E staining: original magnification,  $\times 10$ ; scale bar: 200  $\mu$ m. IHC stainings: original magnification,  $\times 20$ ; scale bar: 100  $\mu$ m.

**Supplementary Table 1. Top 10 upregulated and downregulated genes in Malat1 knockdown (KD) BMDMs.**

| Gene symbol          | Gene name                                                                           | Fold change<br>(Malat1 KD vs control) | P value<br>(adjusted) |
|----------------------|-------------------------------------------------------------------------------------|---------------------------------------|-----------------------|
| Malat1               | metastasis associated lung adenocarcinoma transcript 1<br>(non-coding RNA)          | -25.54                                | 1.19E-232             |
| <b>Downregulated</b> |                                                                                     |                                       |                       |
| Clec16a              | C-type lectin domain family 16, member A                                            | -6.30                                 | 9.63E-45              |
| Pi4ka                | phosphatidylinositol 4-kinase, catalytic, alpha<br>polypeptide                      | -3.33                                 | 6.96E-29              |
| B230118H07Rik        | RIKEN cDNA B230118H07 gene                                                          | -2.70                                 | 3.40E-11              |
| Mgat5                | mannoside acetylglucosaminyltransferase 5                                           | -2.70                                 | 4.80E-15              |
| Ksr1                 | kinase suppressor of ras 1                                                          | -2.56                                 | 7.61E-09              |
| Fpr1                 | formyl peptide receptor 1                                                           | -2.53                                 | 1.18E-14              |
| Aoah                 | acyloxyacyl hydrolase                                                               | -2.51                                 | 3.21E-18              |
| Cd300e               | CD300e antigen                                                                      | -2.46                                 | 4.39E-18              |
| Igsf9                | immunoglobulin superfamily, member 9                                                | -2.23                                 | 1.26E-09              |
| Fcrl5                | Fc receptor-like 5                                                                  | -2.23                                 | 4.69E-06              |
| <b>Upregulated</b>   |                                                                                     |                                       |                       |
| Mybpc3               | myosin binding protein C, cardiac                                                   | 18.82                                 | 1.04E-120             |
| Avil                 | advillin                                                                            | 7.67                                  | 4.03E-45              |
| Bzrap1               | benzodiazepine receptor associated protein 1                                        | 7.08                                  | 4.91E-61              |
| Gm42547              | predicted gene, 42547                                                               | 5.17                                  | 9.43E-36              |
| Mdk                  | midkine                                                                             | 3.15                                  | 6.21E-13              |
| Ero11b               | ERO1-like beta (S. cerevisiae)                                                      | 3.03                                  | 3.95E-21              |
| Gm35339              | predicted gene, 35339                                                               | 2.85                                  | 1.21E-13              |
| 0610037L13Rik        | RIKEN cDNA 0610037L13 gene                                                          | 2.68                                  | 6.14E-14              |
| Rltpr                | RGD motif, leucine rich repeats, tropomodulin domain<br>and proline-rich containing | 2.66                                  | 3.25E-09              |
| Ankrd2               | ankyrin repeat domain 2 (stretch responsive muscle)                                 | 2.45                                  | 4.31E-08              |

Figure 5

**B**

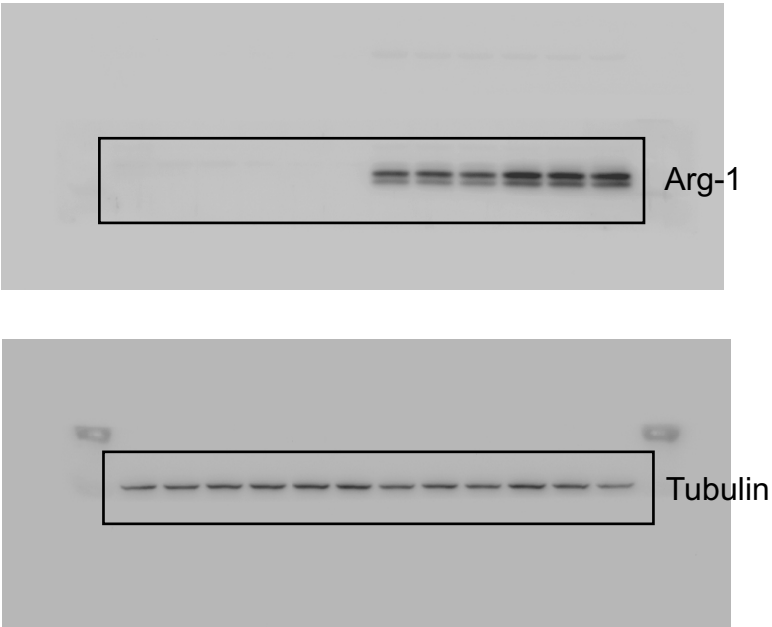

Supplementary Figure 1

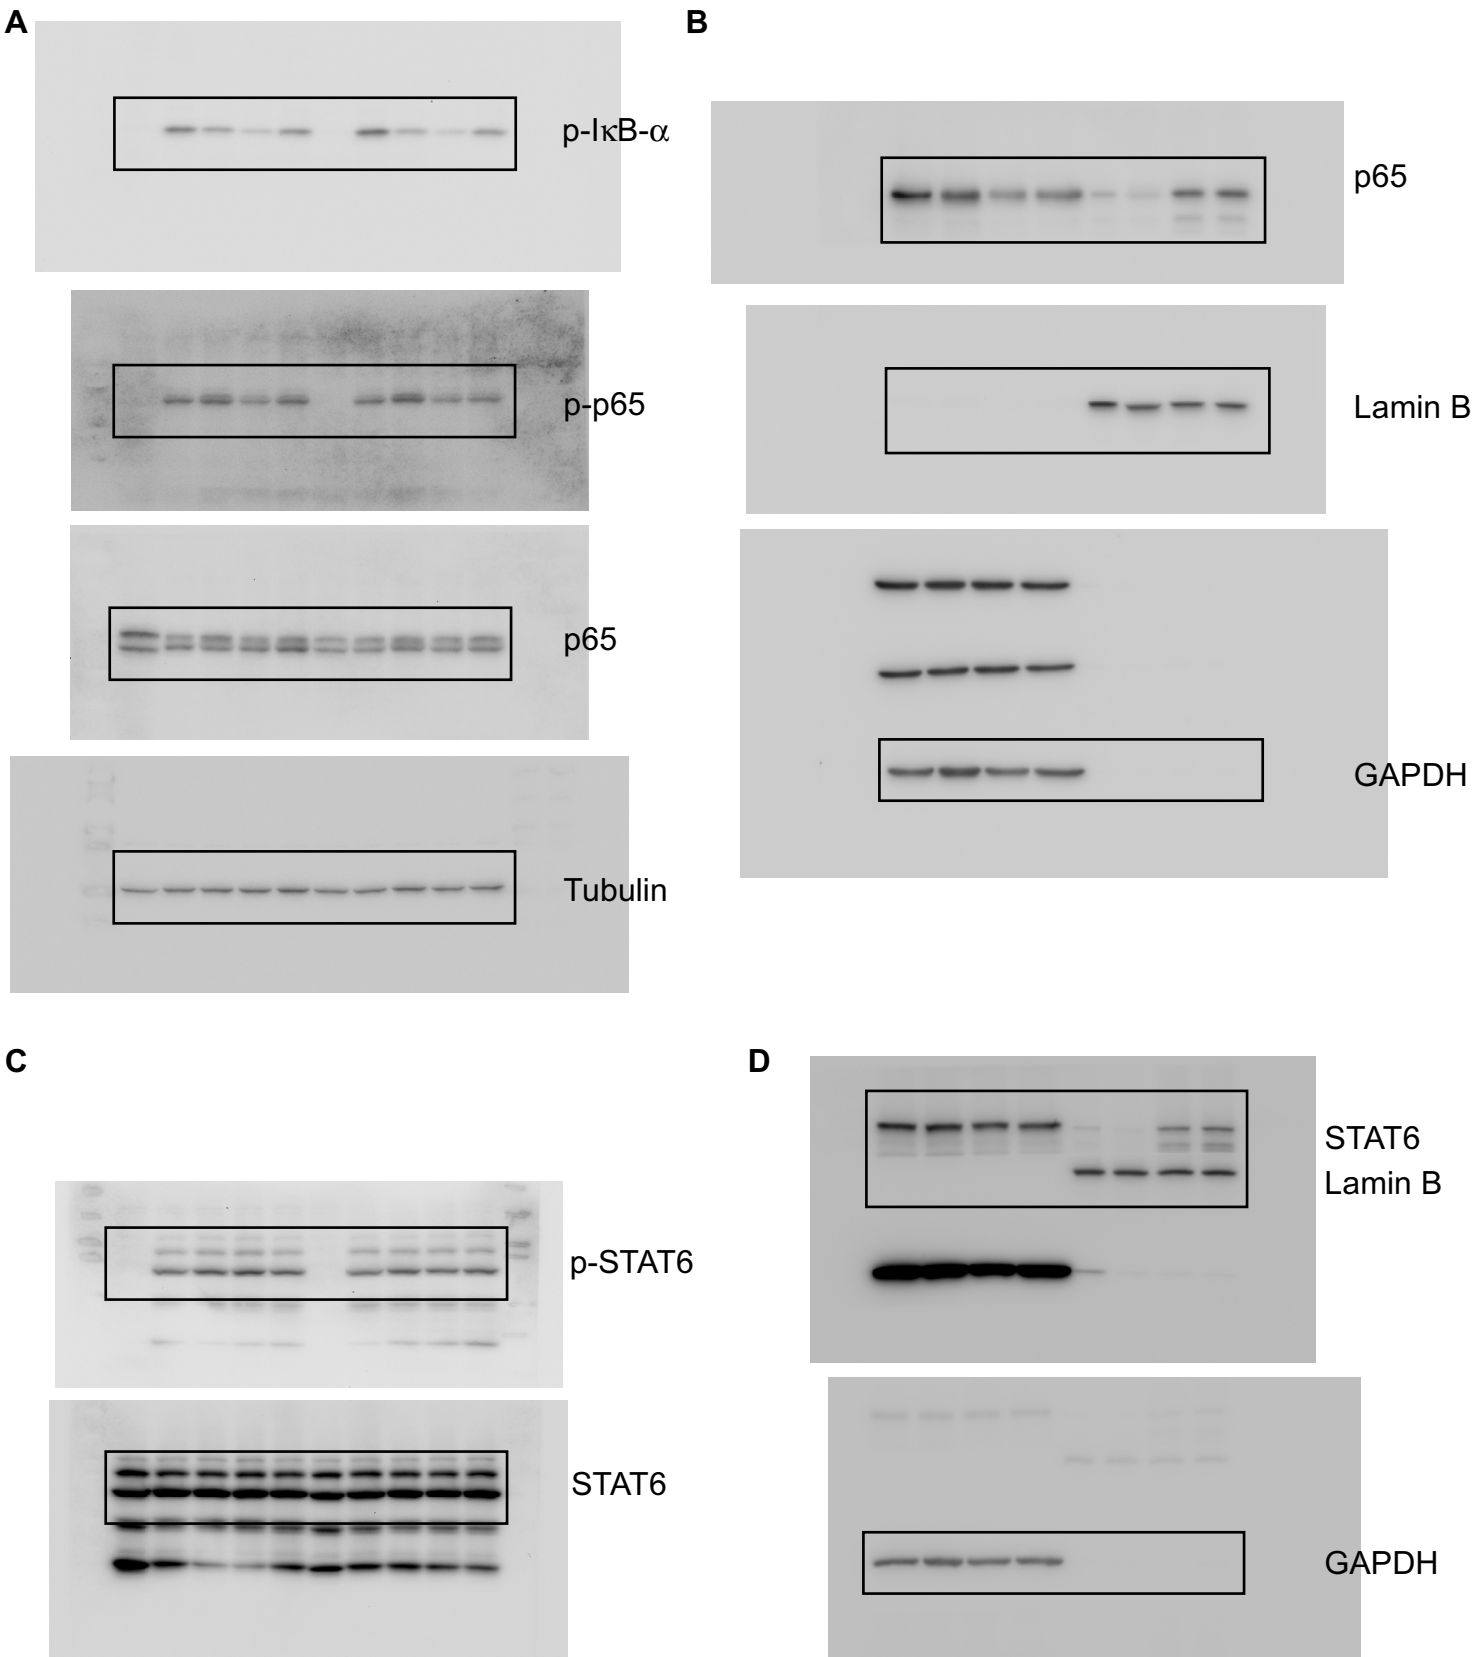

### Supplementary Figure 3

**E**

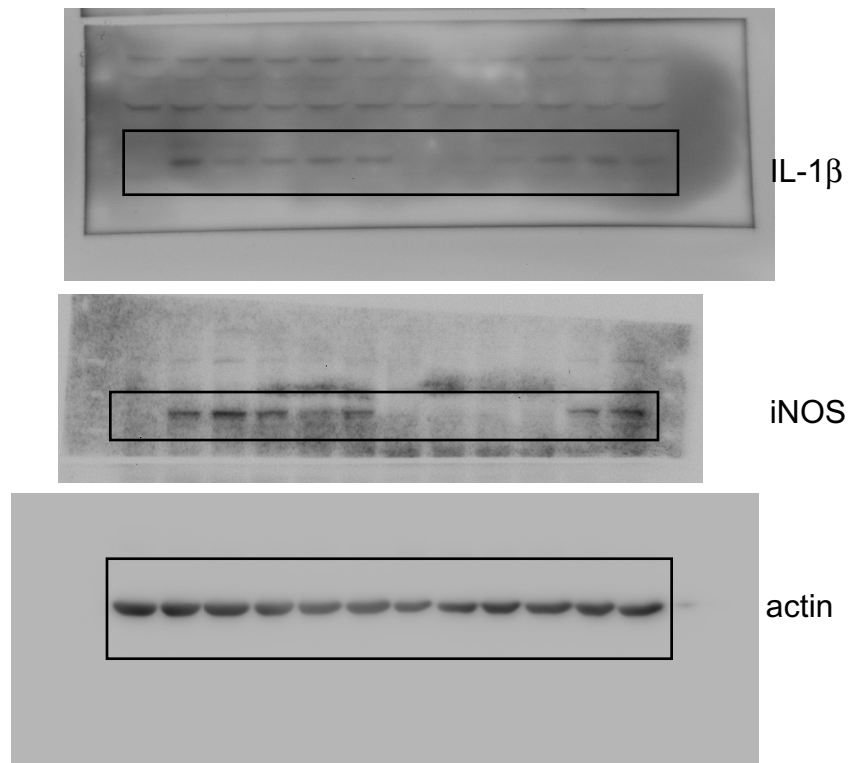

Supplement: sd1 [file 1]
